# Supplementary material for: Label free electrochemical detection of stress hormone cortisol using sulphur doped graphitic carbon nitride on carbon fiber paper electrode
Source: Royal Society of Chemistry journal article supplement (doi:10.1039/d2nj03643f), 2022-01-01
Supplement: d2nj03643f1.pdf [file d2nj03643f1.pdf]

## Label free electrochemical detection of stress hormone-cortisol by chemiresistor sulphur doped graphitic carbon nitride on carbon fiber paper electrode

Anila Rose Cherian<sup>a</sup>, Keerthana.P<sup>a</sup>, Vinay S Bhat<sup>b</sup>, Uraivan Sirimahachai<sup>c</sup>, Anitha Varghese<sup>a\*</sup>, Gurumurthy Hegde<sup>ad\*\*</sup>

### Supplementary File

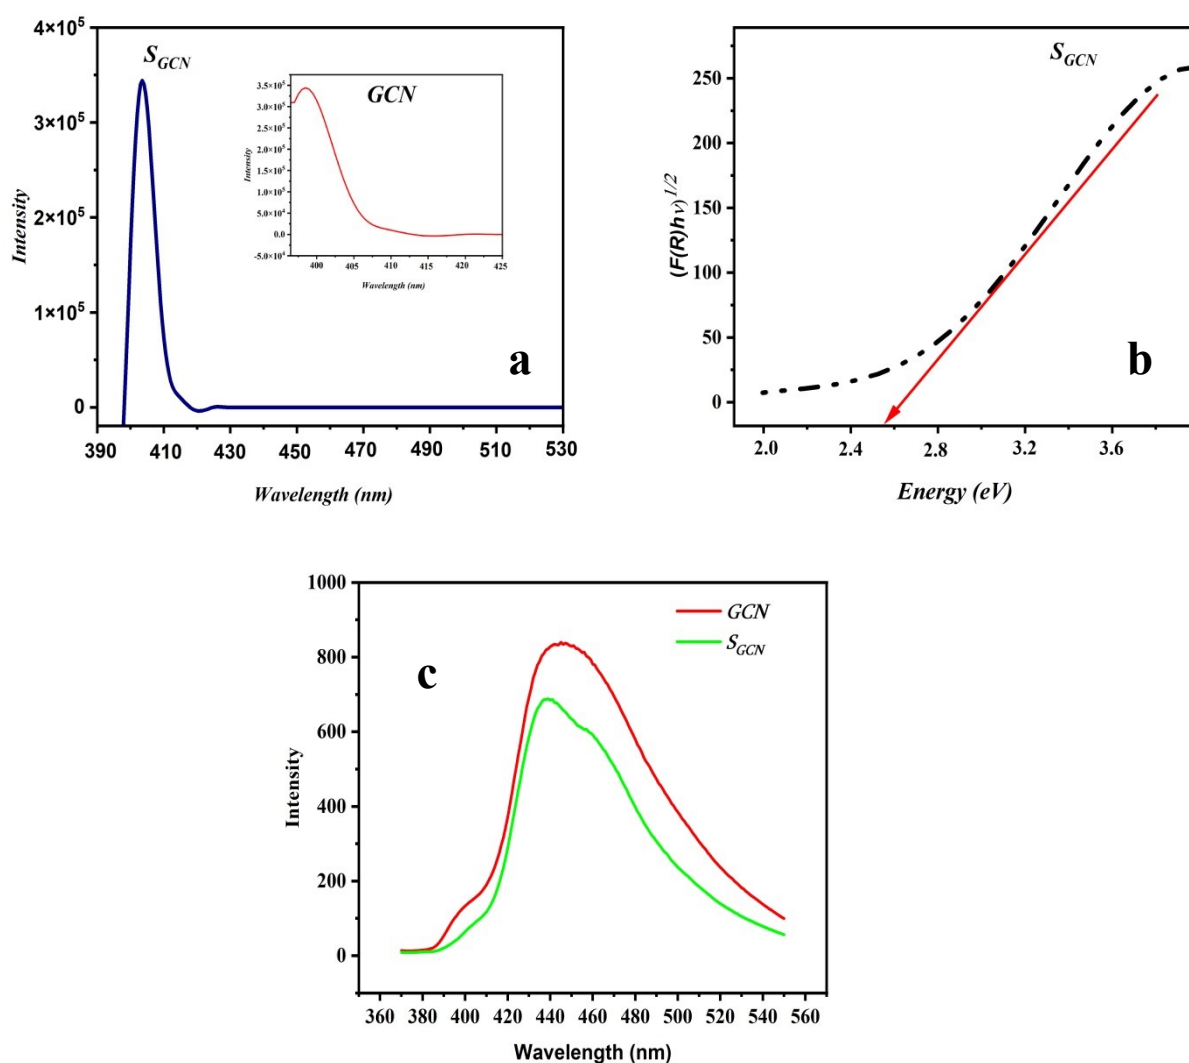

**Fig.S1** a) UV-vis diffuse absorbance spectra and related Tauc plot spectra b) and c) photoluminescence (PL) spectra of bulk  $S_{GCN}$  and GCN.

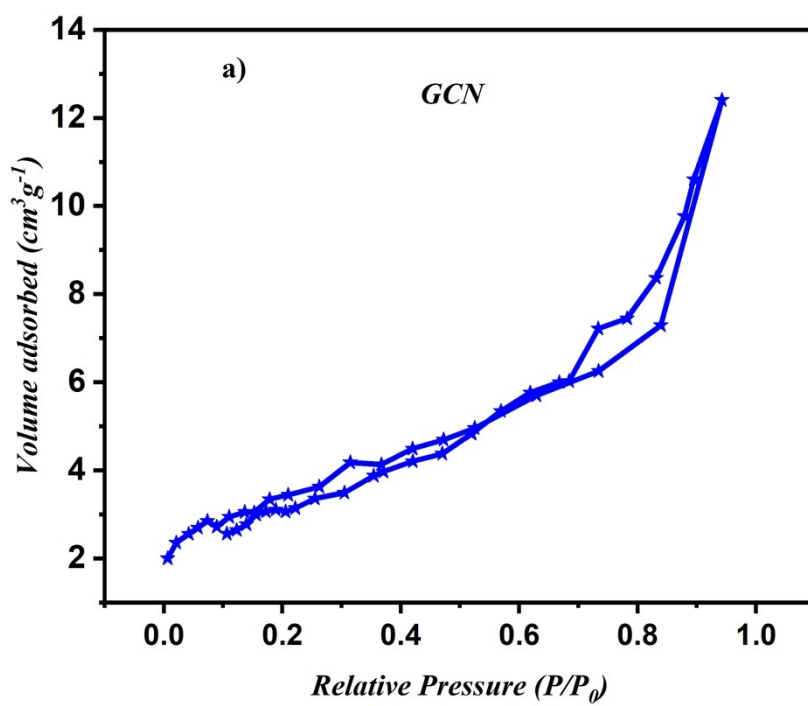

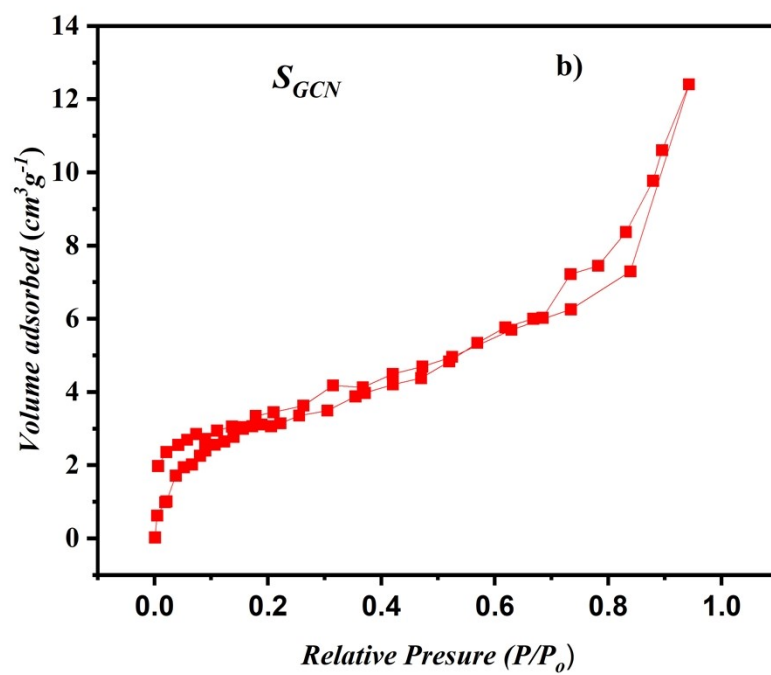

Fig.S2 Nitrogen sorption assays of a) GCN and b)  $S_{GCN}$

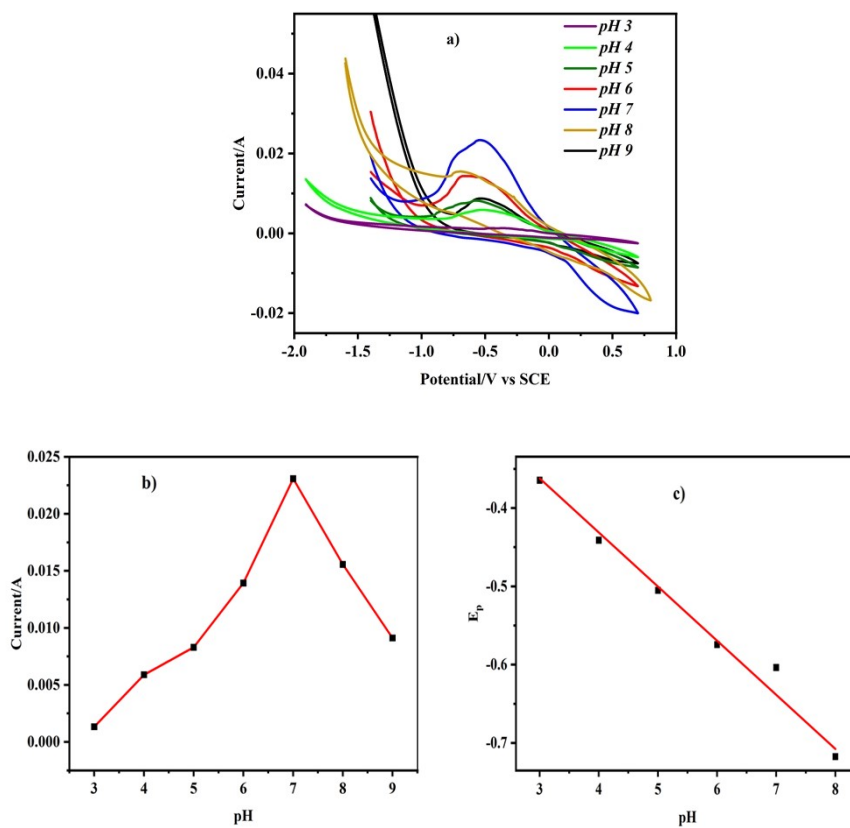

**Fig S3.** a) CVs for 0.1mM cortisol in 0.010 M PBS with pH varying from 3–9 recorded with  $S_{GCN}/CFP$  electrode. b) Cortisol oxidation pH vs Current and c) pH vs Potential

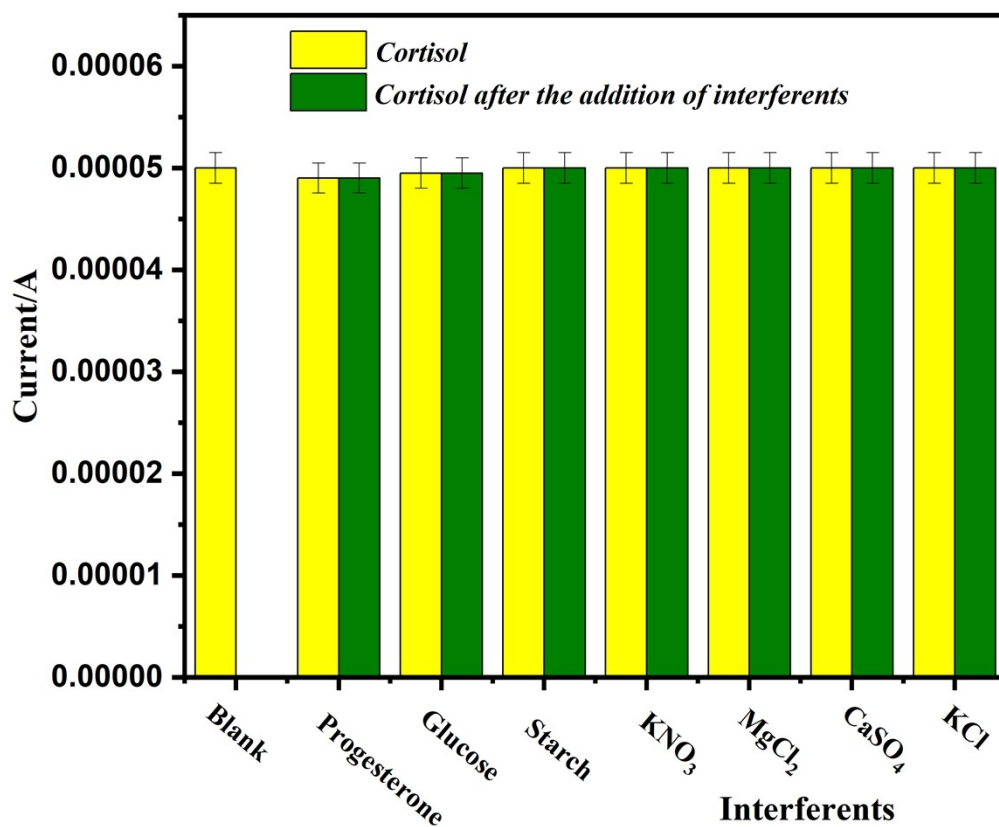

**Fig.S4** The electrochemical current response of cortisol (30 μM) at S<sub>GCN</sub>/CFP electrode in the presence of potential interferent progesterone (150 μM) and other interferents of concentration of 300 μM.

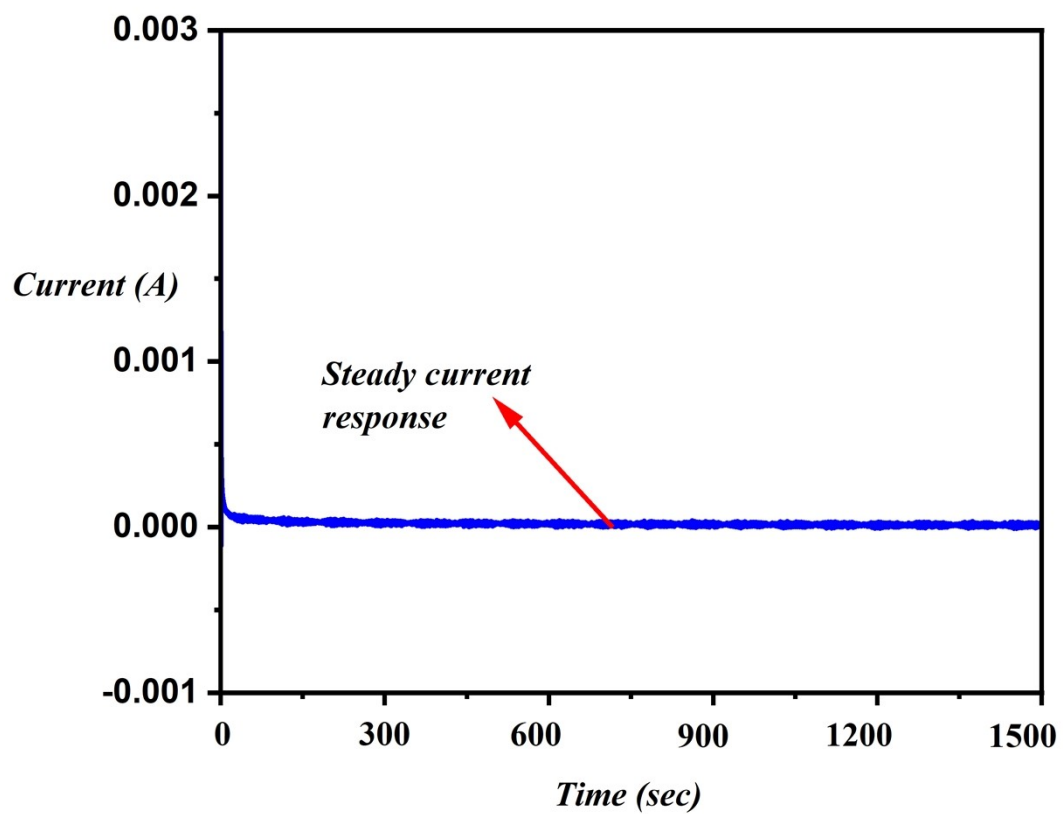

**Fig.S5** Chronoamperometric current response on applying a constant potential of 600mV for 30 min into an electrolyte solution cortisol analyte at S<sub>GCN</sub>/CFP electrode.
